# Supplementary material
Source: PubMed Central journal article supplement (PMC1635121)

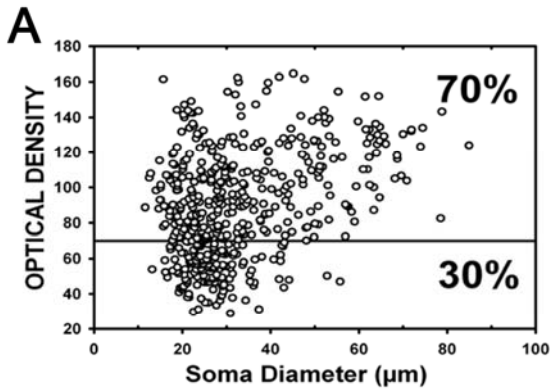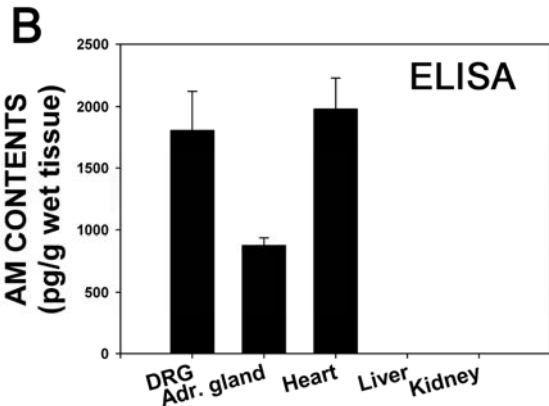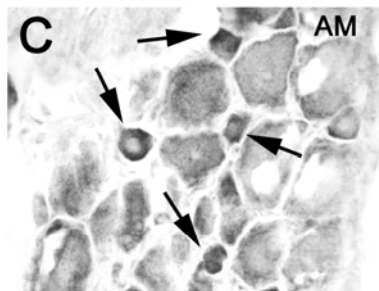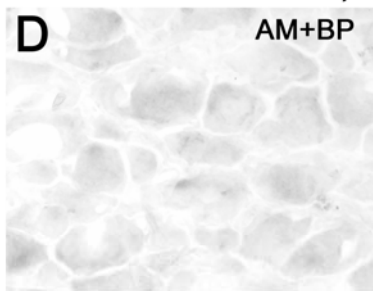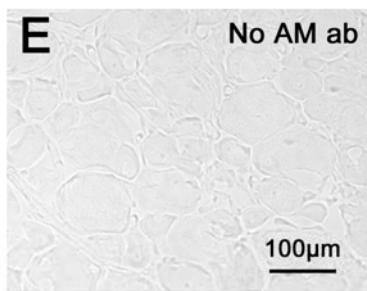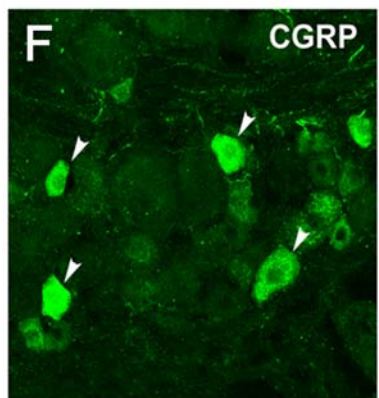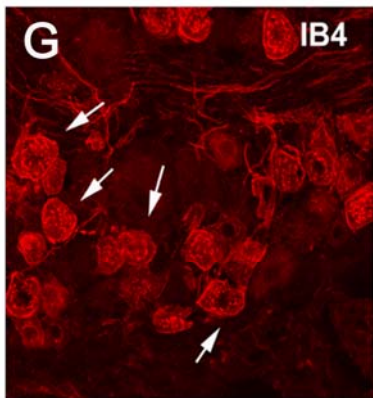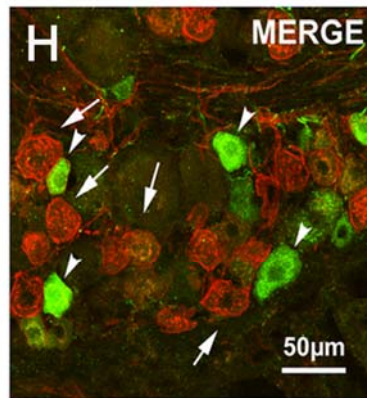

Supplement: pnas_0602488103_1.pdf [file pnas_0602488103_1.pdf]

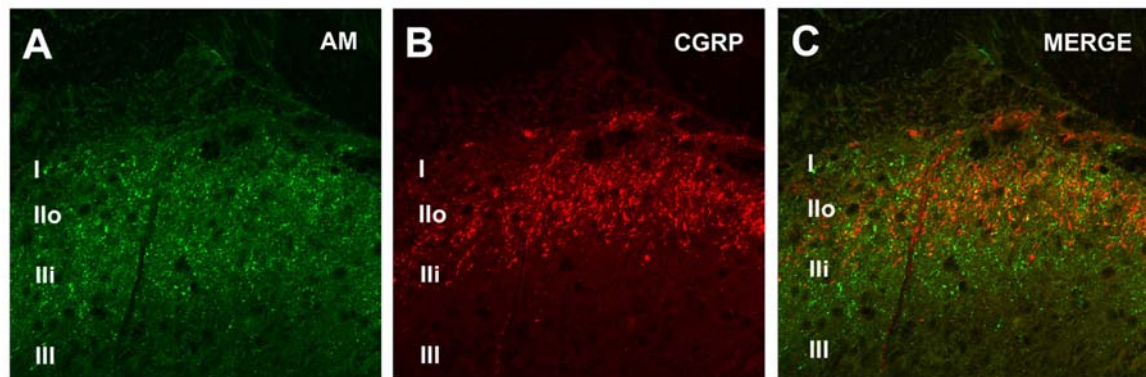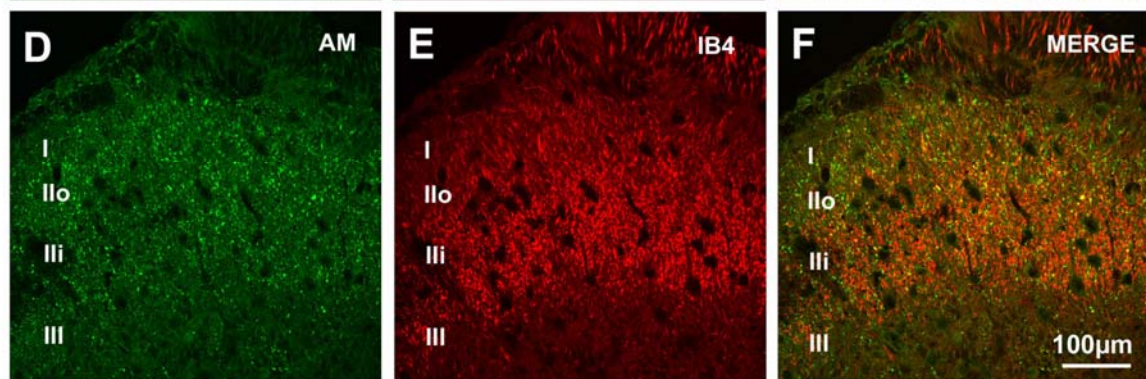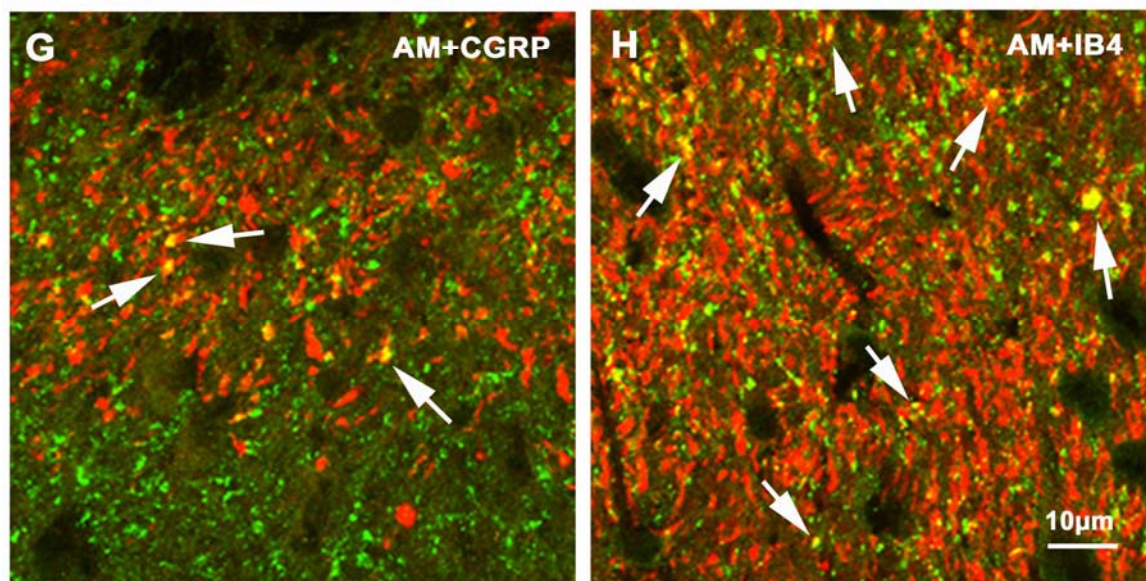

Supplement: pnas_0602488103_2.pdf [file pnas_0602488103_2.pdf]

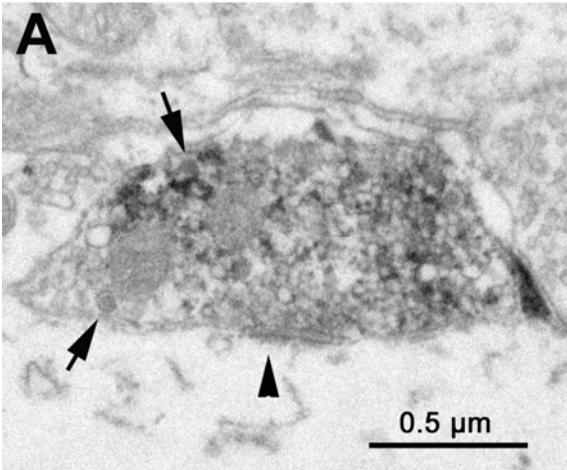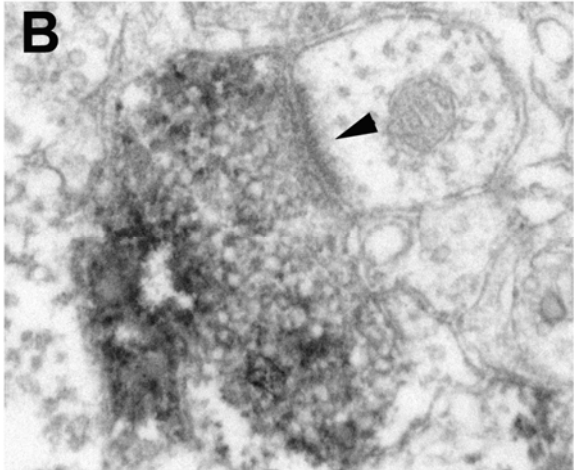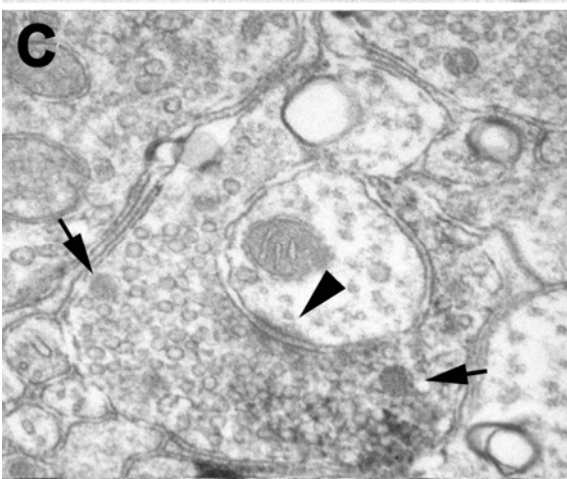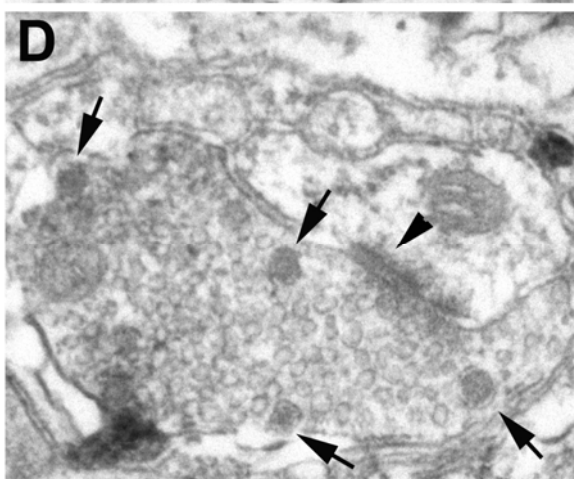

Supplement: pnas_0602488103_3.pdf [file pnas_0602488103_3.pdf]

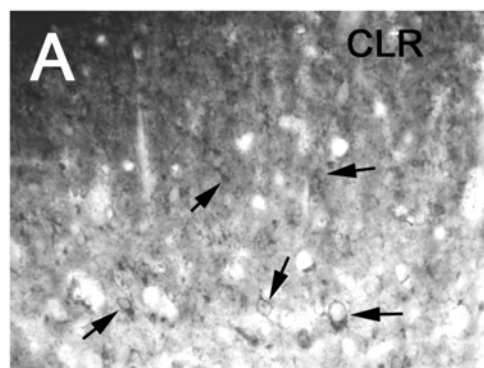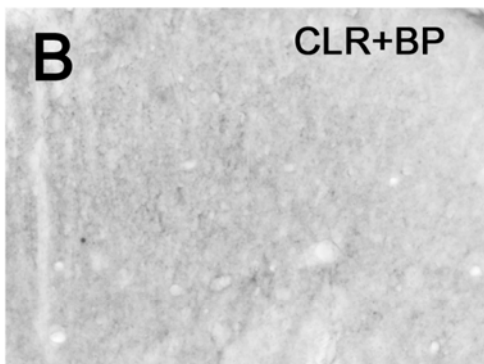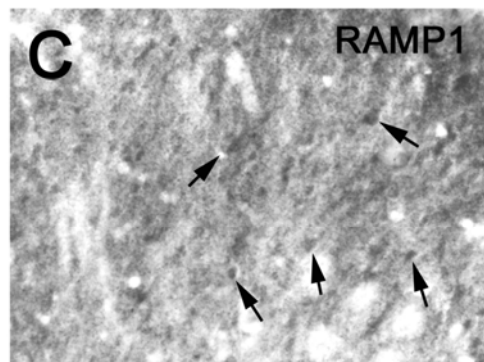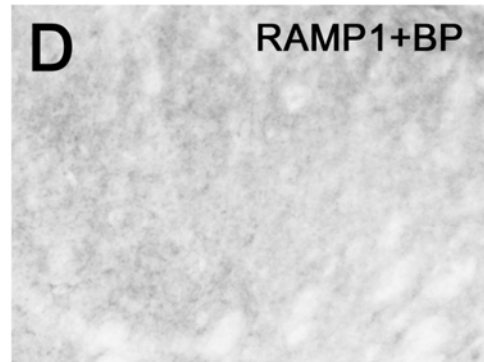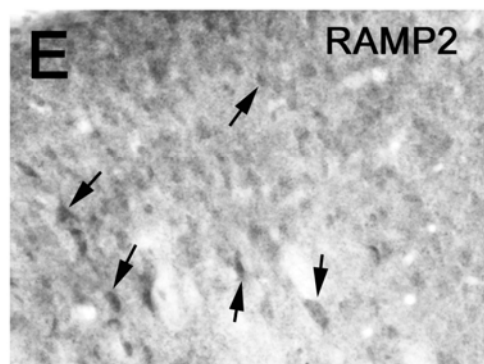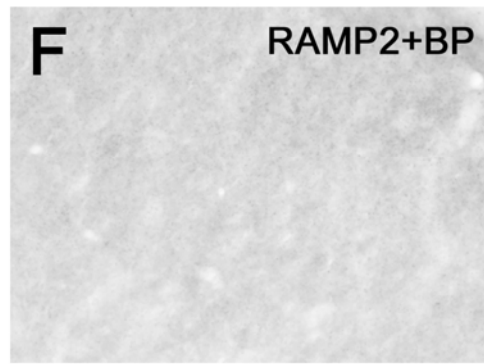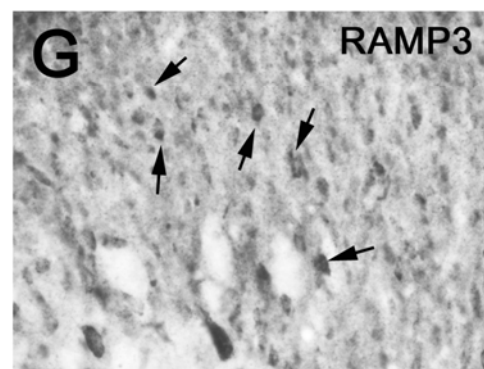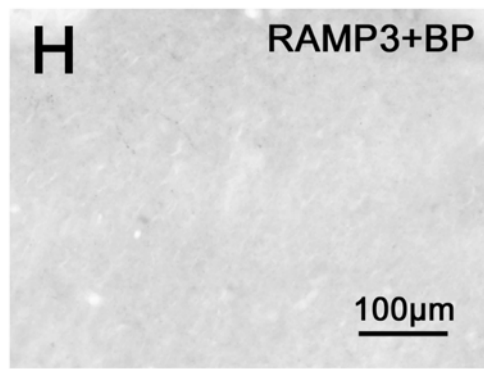

Supplement: pnas_0602488103_4.pdf [file pnas_0602488103_4.pdf]

**A**

i.t. Vehicle

i.t. adrenomedullin

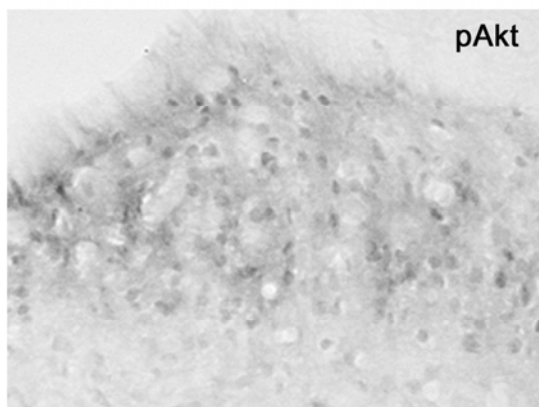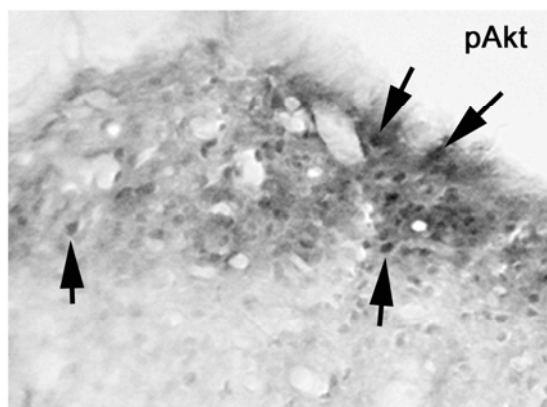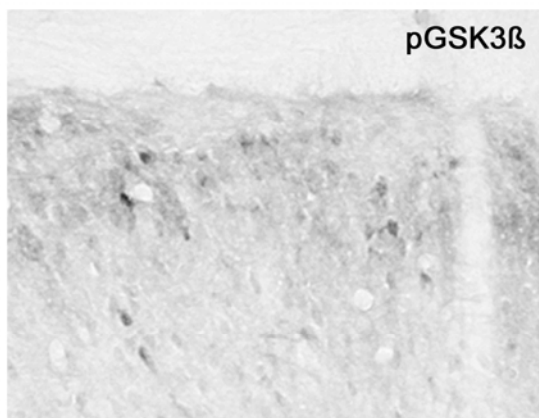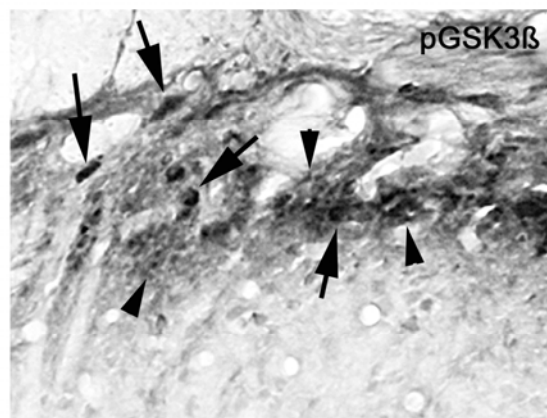**B**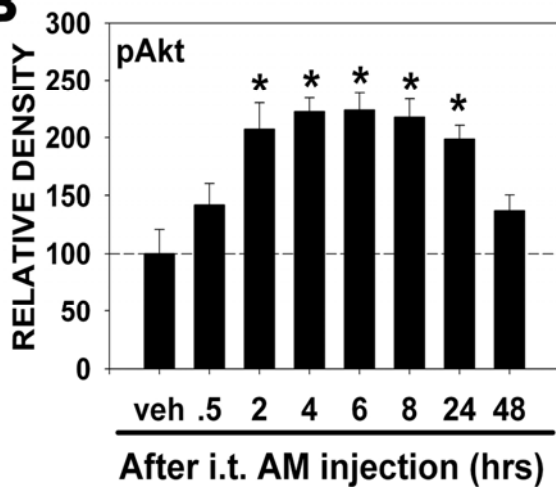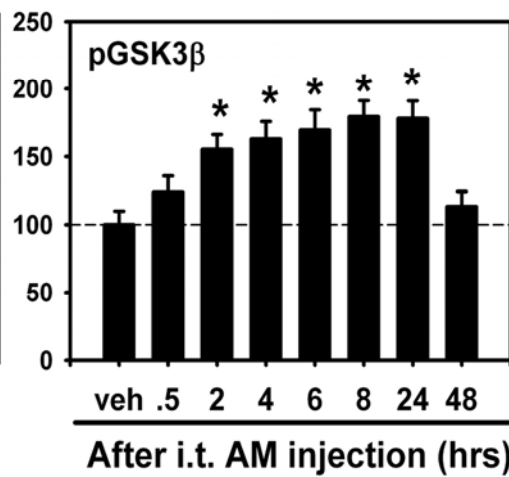

Supplement: pnas_0602488103_5.pdf [file pnas_0602488103_5.pdf]

**A**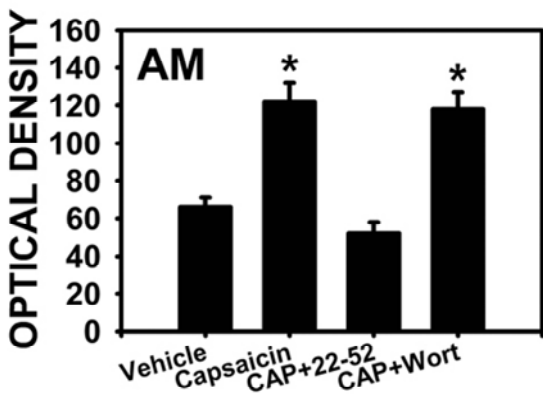**B**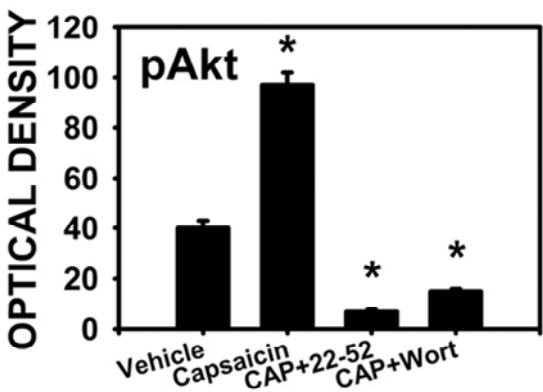**C**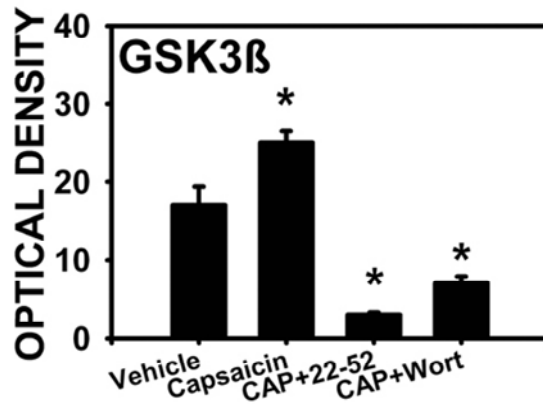

Supplement: pnas_0602488103_6.pdf [file pnas_0602488103_6.pdf]
